# Supplementary material for: Rational design of N-doped CNTs@C3N4 network for dual-capture of biocatalysts in enzymatic glucose/O2 biofuel cells
Source: Royal Society of Chemistry journal article supplement (doi:10.1039/d1nr00407g), 2021-01-01
Supplement: d1nr00407g1.pdf [file d1nr00407g1.pdf]

***Supporting Information for***

**Rational design of N-doped CNTs@C<sub>3</sub>N<sub>4</sub> network for dual-capture of biocatalysts in enzymatic glucose/O<sub>2</sub> biofuel cells**

Gangyong Li,<sup>a,b</sup> Guangming Ren,<sup>c</sup> Wei (Alex) Wang,<sup>d</sup> and Zongqian Hu<sup>b\*</sup>

<sup>a</sup>*State Key Laboratory of Advanced Metallurgy, University of Science and Technology Beijing, Beijing, 100083, P. R. China*

<sup>b</sup>*Beijing Institute of Radiation Medicine, Beijing, 100850, P. R. China. E-mail: huzongqian@hotmail.com*

<sup>c</sup>*Beijing Institute of Lifeomics, Beijing, 102206, P. R. China*

<sup>d</sup>*Beijing Key Laboratory of Bio-inspired Energy Materials and Devices, School of Space and Environment, Beihang University, Beijing, 100191, P. R. China*

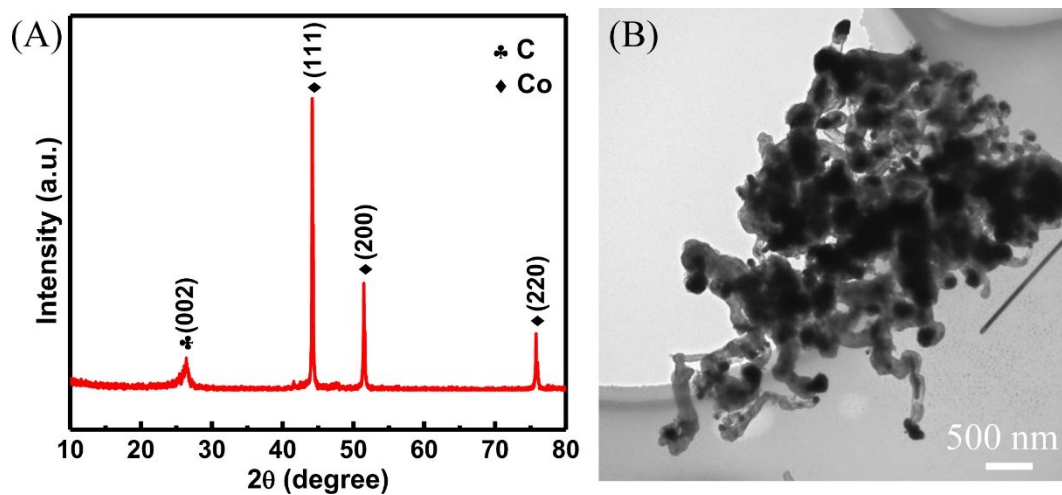

**Fig. S1** (A) XRD pattern and (B) TEM image of Co@N-CNTs@C<sub>3</sub>N<sub>4</sub>.

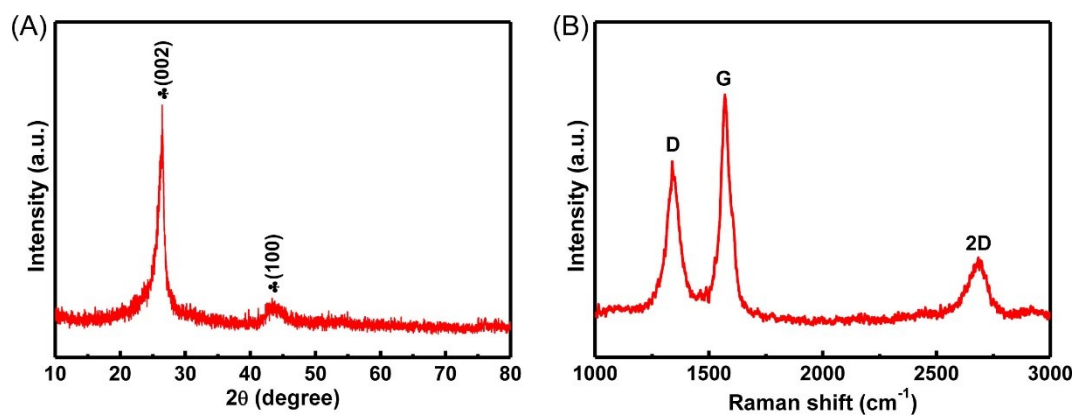

**Fig. S2** (A) XRD pattern and (B) Raman spectrum of N-CNTs@C<sub>3</sub>N<sub>4</sub> after washing with HCl.

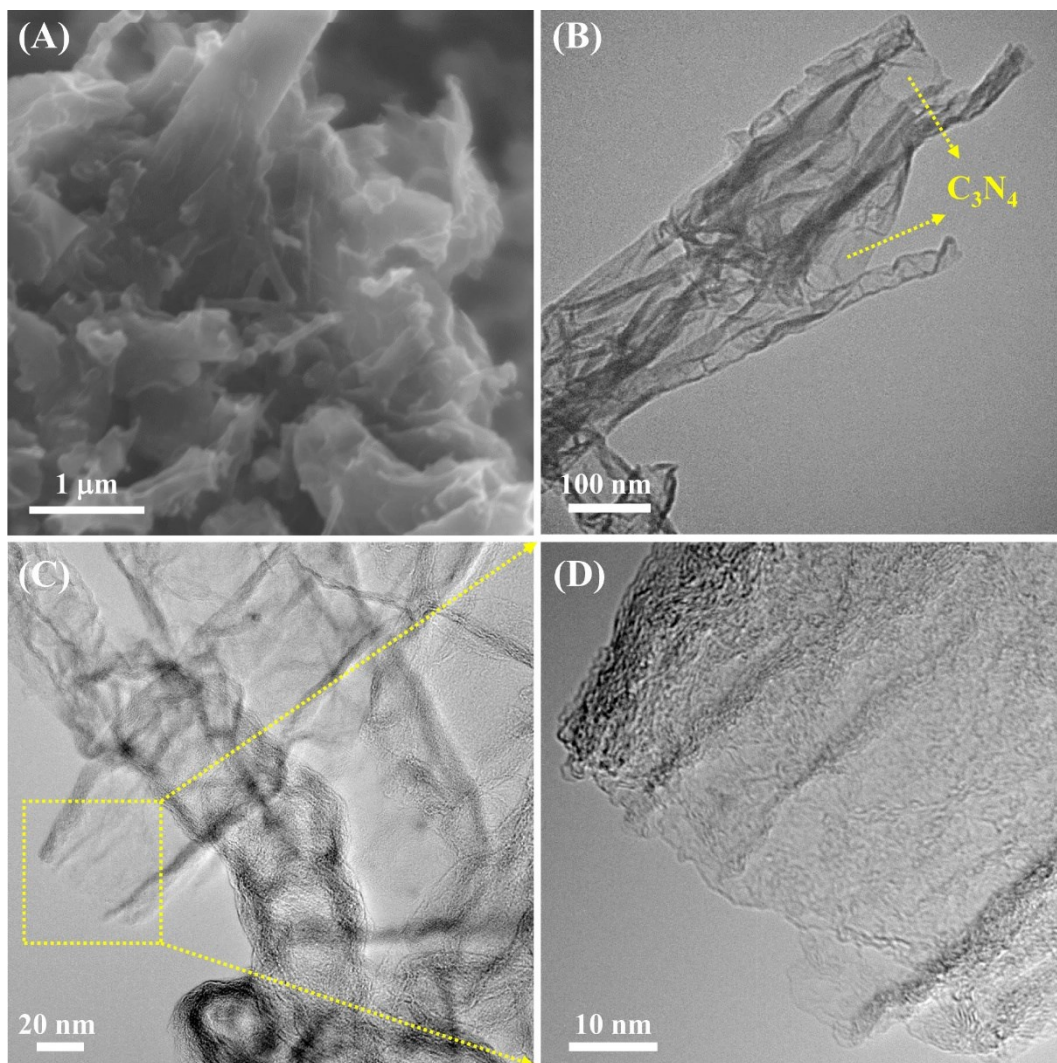

**Fig. S3** (A) SEM and (B-D) TEM images of N-CNTs@ $\text{C}_3\text{N}_4$ .

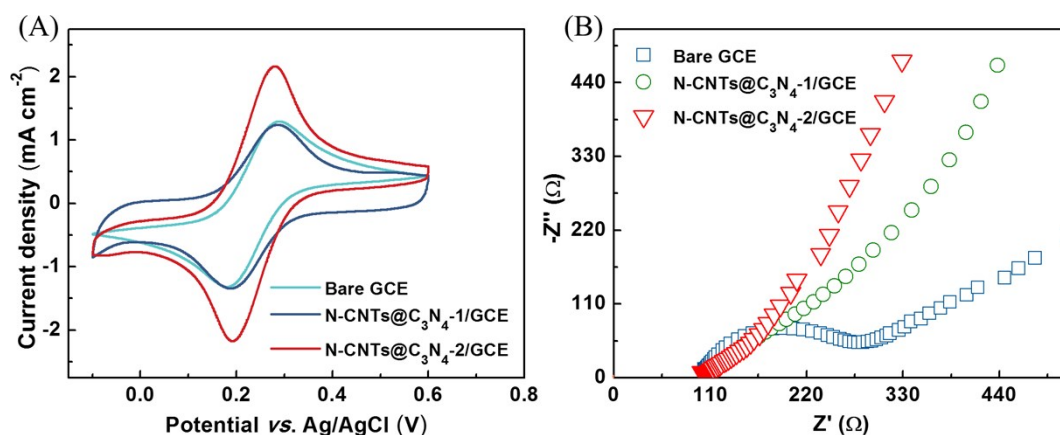

**Fig. S4** (A) CV curves and (B) Nyquist plots of bare GCE, N-CNTs@C<sub>3</sub>N<sub>4</sub>-1/GCE, and N-CNTs@C<sub>3</sub>N<sub>4</sub>-2/GCE with 5 mM [Fe(CN)<sub>6</sub>]<sup>3-/4-</sup> in 0.1 M KCl solution. Scan rate = 50 mV s<sup>-1</sup>.

The electrochemical performance of bare GCE, N-CNTs@C<sub>3</sub>N<sub>4</sub>-1 (after washing with HCl), and N-CNTs@C<sub>3</sub>N<sub>4</sub>-2 (after washing with HCl and then thermal annealing at 1600 °C for 2 h) modified GCE was investigated using CV and EIS. **Fig. S4A** provides CV curves of bare GCE, N-CNTs@C<sub>3</sub>N<sub>4</sub>-1/GCE, and N-CNTs@C<sub>3</sub>N<sub>4</sub>-2/GCE with 5 mM [Fe(CN)<sub>6</sub>]<sup>3-/4-</sup> in 0.1 M KCl solution at 50 mV s<sup>-1</sup>. The three electrodes exhibit a well-defined redox peak. Note that N-CNTs@C<sub>3</sub>N<sub>4</sub>-2/GCE manifests higher faradaic current and lower peak-to-peak separation ( $\Delta E_p$ ) value than those of bare GCE and N-CNTs@C<sub>3</sub>N<sub>4</sub>-1/GCE, indicating high electroactive area and fast electron transfer kinetics of N-CNTs@C<sub>3</sub>N<sub>4</sub>-2/GCE. **Fig. S4B** depicts EIS results of the three electrodes. The diameter of the semicircles in the high- and middle-frequency represents the charge transfer resistance. No obvious semicircles can be found in N-CNTs@C<sub>3</sub>N<sub>4</sub>-1/GCE and N-CNTs@C<sub>3</sub>N<sub>4</sub>-2/GCE, indicating faster electron transfer kinetics within the N-CNTs@C<sub>3</sub>N<sub>4</sub> modified electrode than bare GCE. Therefore, it is expected that the immobilization of enzymes on N-CNTs@C<sub>3</sub>N<sub>4</sub> modified electrode would improve the electrochemical performance due to its enhanced electrical conductivity.

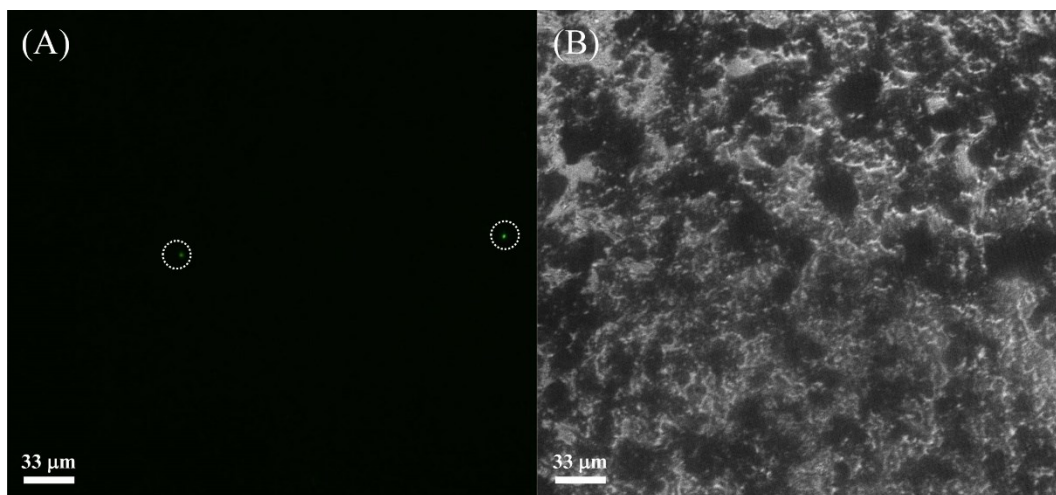

**Fig. S5** CLSM images of N-CNTs@C<sub>3</sub>N<sub>4</sub> in the absence of GOx under excitation light (A) and under objective (B). The white dotted circles in **Fig. S5A** mark out the sparse fluorescent spots.

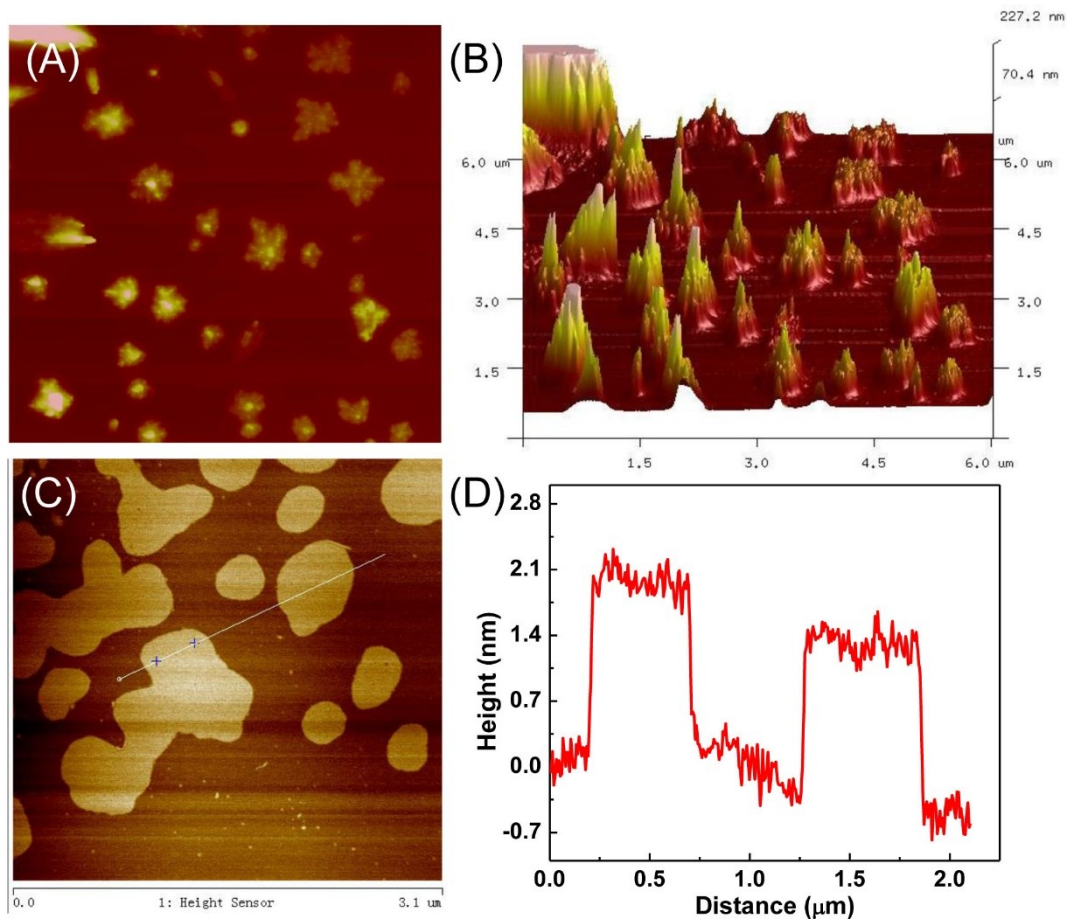

**Fig. S6** (A) 2D and (B) 3D AFM images of N-CNTs@C<sub>3</sub>N<sub>4</sub>. (C) 2D AFM image of C<sub>3</sub>N<sub>4</sub> nanosheets. (D) Height profile of the trace line in **Fig. S6C**.

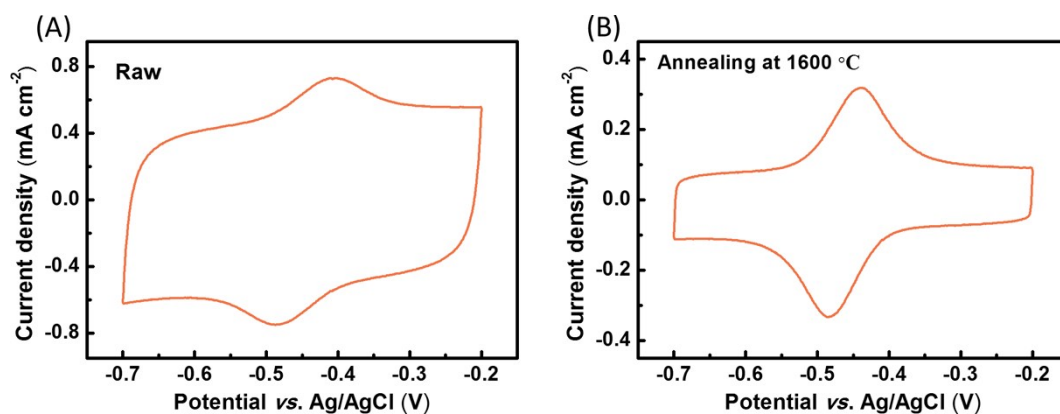

**Fig. S7** CV curves of GOx/N-CNTs@C<sub>3</sub>N<sub>4</sub>/GCE in 0.1 M PBS (pH 7.2) saturated with Ar. Scan rate: 50 mV s<sup>-1</sup>. (A) N-CNTs@C<sub>3</sub>N<sub>4</sub> after washing with HCl. (B) N-CNTs@C<sub>3</sub>N<sub>4</sub> after washing with HCl and then thermal annealing at 1600 °C for 2 h.

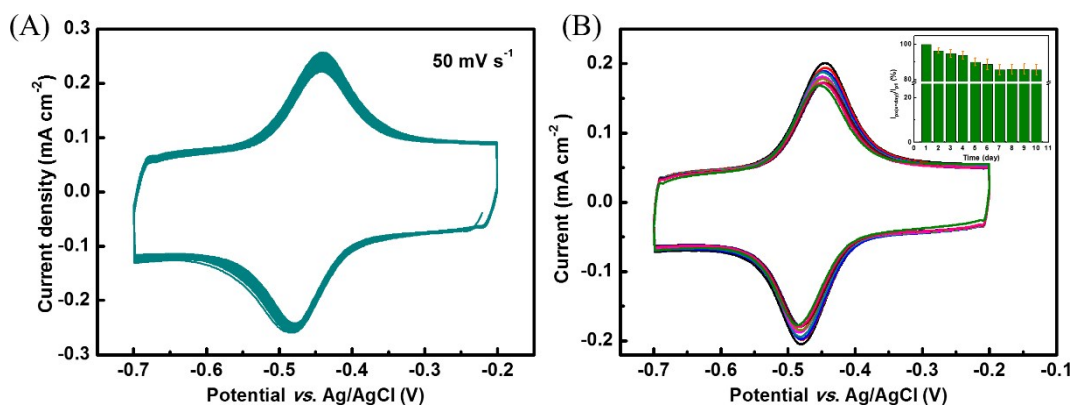

**Fig. S8** (A) CV curves of GOx/N-CNTs@C<sub>3</sub>N<sub>4</sub>/GCE in Ar-saturated 0.1 M PBS (pH 7.2) at 50 mV s<sup>-1</sup> for 200 cycles. (B) CV curves of GOx/N-CNTs@C<sub>3</sub>N<sub>4</sub>/GCE in Ar-saturated 0.1M PBS (pH 7.2) for 10 days by once a day. Scan rate = 50 mV s<sup>-1</sup>. Inset shows the I<sub>p</sub>/I<sub>p1</sub> (%) of 3 electrodes.

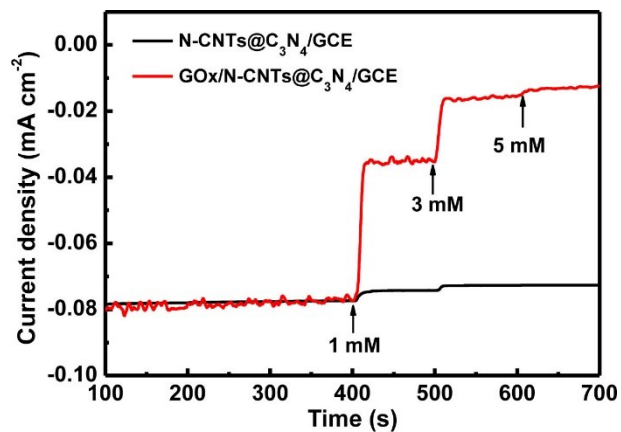

**Fig. S9** Comparison of amperometric response of the GOx/N-CNTs@C<sub>3</sub>N<sub>4</sub>/GCE and N-CNTs@C<sub>3</sub>N<sub>4</sub>/GCE to successive addition of glucose in 0.1 M PBS (pH 7.2) at an applied potential of -0.42 V.

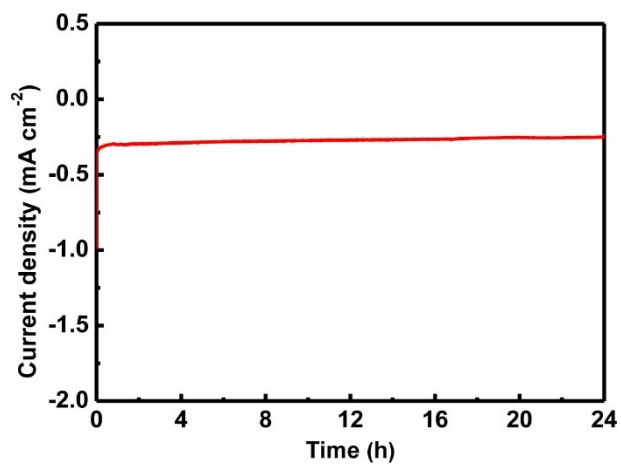

**Fig. S10** Chronoamperometry (i-t) curve of Lac/N-CNTs@C<sub>3</sub>N<sub>4</sub>/GCE biocathode collected at 0 V (vs. Ag/AgCl) in O<sub>2</sub>-saturated 0.04 M B-R solution (pH 5.0).



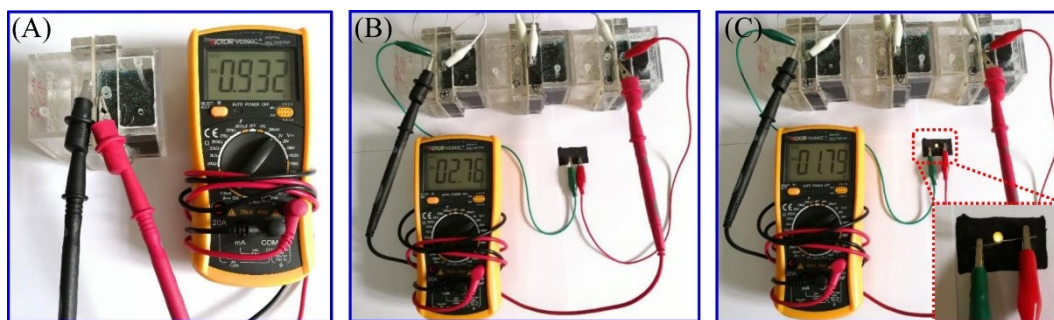

**Fig. S11** (A) Digital photograph of a single glucose/ $O_2$  BFC showing a high OCP of 0.932 V. (B) Digital photograph of three glucose/ $O_2$  BFCs in series generating an OCP of 2.76 V. (C) Digital photograph of three glucose/ $O_2$  BFCs in series powering a yellow LED lamp.

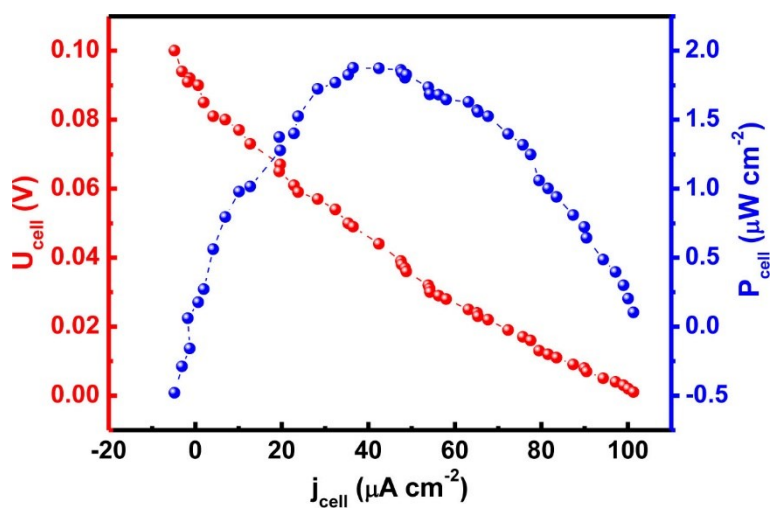

**Fig. S12** Dependence of the  $U_{cell}$  and  $P_{cell}$  on the  $j_{cell}$  for the fuel cell in the absence of enzymes under ambient air.

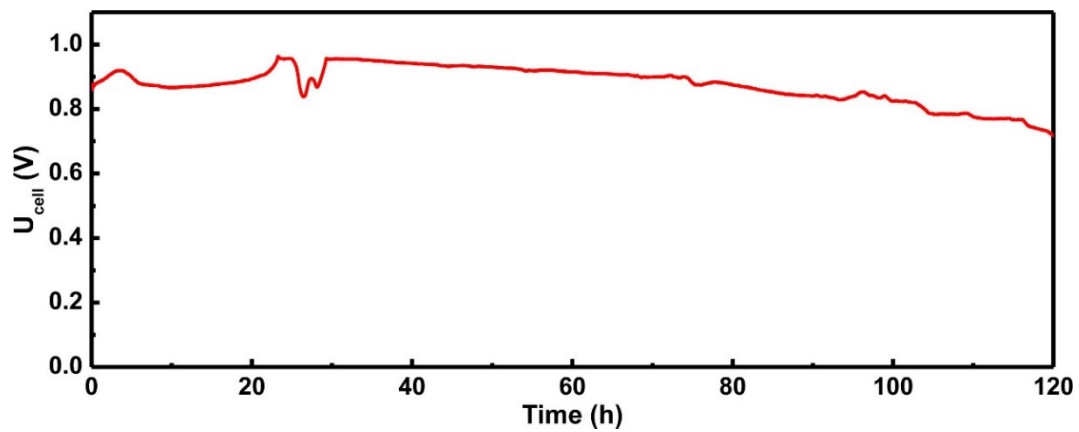

**Fig. S13**  $U_{cell}$  vs. time for the fabricated glucose/ $O_2$  BFC continuously operating at 100 k $\Omega$  for 120 h.

**Table S1** Comparison of electrochemical parameters of the GOx modified electrodes<sup>a</sup>.

| Modified electrode                            | E <sup>'0</sup><br>(mV) | pH  | k <sub>s</sub><br>(s <sup>-1</sup> ) | Γ*<br>(mol cm <sup>-2</sup> ) | Ref.      |
|-----------------------------------------------|-------------------------|-----|--------------------------------------|-------------------------------|-----------|
| GOx/N-CNTs@C <sub>3</sub> N <sub>4</sub> /GCE | -457                    | 7.2 | 4.78                                 | 8.26×10 <sup>-10</sup>        | This work |
| AuNPs/GOD-CNT-PVA/GC                          | -504                    | 7.0 | 2.2                                  | 2.56×10 <sup>-10</sup>        | 1         |
| GCNT/GOD/GAD/GC                               | -400                    | 7.0 | 1.08                                 | 3.88×10 <sup>-9</sup>         | 2         |
| GOD/NH <sub>2</sub> -TiO <sub>2</sub> -CNT/GC | -460                    | 7.4 | 3.5                                  | 8.77×10 <sup>-11</sup>        | 3         |
| GOD/PDDA-HCNTs/MGC                            | -476.5                  | 7.4 | –                                    | 1.36×10 <sup>-10</sup>        | 4         |
| NF/ZnO/(PSS/PDDA) <sub>3</sub> /GO D/ITO/GC   | -105                    | 6.0 | 2.16                                 | 3.57×10 <sup>-11</sup>        | 5         |
| NF/GOD-MC/GC                                  | -437.5                  | 7.0 | 4.1                                  | 3.62×10 <sup>-12</sup>        | 6         |

<sup>a</sup> GOx = glucose oxidase; N-CNTs = N-doped carbon nanotubes; C<sub>3</sub>N<sub>4</sub> = carbon nitride; GCE = glassy carbon electrode; AuNPs = gold nanoparticles; GOD = glucose oxidase; PVA = polyvinyl alcohol; GC = glassy carbon; GCNT = gelatin-multiwalled carbon nanotube; GAD = glutaraldehyde; PDDA-HCNTs = poly(diallyldimethylammonium chloride) functionalized helical carbon nanotubes; MGCE = magnetic glass carbon electrode; PSS = poly(sodium 4-styrenesulfonate); ITO = indium tin oxide; MC= mesoporous carbon FDU-15.

## References

- 1 H. Zhang, Z. Meng and Q. Wang, J. Zheng, *Sens Actuators B*, 2011, **158**, 23-27.
- 2 A. P. Periasamy, Y. J. Chang and S. M. Chen, *Bioelectrochemistry*, 2011, **80**, 114-120.
- 3 M. Tasviri, H. A. Rafiee-Pour, H. Ghourchian and M. R. Gholami, *J. Mol. Catal. B, Enzym.*, 2011, **68**, 206-210.
- 4 R. Cui, Z. Han, J. Pan, E. S. Abdel-Halim and J. J. Zhu, *Electrochim. Acta*, 2011, **58**, 179-183.
- 5 Y. Zhai, S. Zhai, G. Chen, K. Zhang, Q. Yue, L. Wang, J. Liu and J. Jia, *J. Electroanal. Chem.*, 2011, **656**, 198-205.
- [6] K. Wang, H. Yang, L. Zhu, Z. Ma, S. Xing, Q. Lv, J. Liao, C. Liu and W. Xing, *Electrochim.*

*Acta*, 2009, **54**, 4626-4630.

**Table S2** Performance of 3D structures as bioelectrodes applied in EBFC application<sup>b</sup>.

| Anode                                                    | Cathode                                                  | OCP<br>(V)  | P <sub>max</sub><br>(mW cm <sup>-2</sup> ) | Ref.                 |
|----------------------------------------------------------|----------------------------------------------------------|-------------|--------------------------------------------|----------------------|
| <b>GOx/N-CNTs@C<sub>3</sub>N<sub>4</sub>/Ni<br/>foam</b> | <b>Lac/N-CNTs@C<sub>3</sub>N<sub>4</sub>/Ni<br/>foam</b> | <b>0.93</b> | <b>0.570</b>                               | <b>This<br/>work</b> |
| GOx/OMCs/GCE                                             | Pt                                                       | 1.20        | 0.110                                      | 1                    |
| GOx/3D-GNs/Fc/GCE                                        | Lac/3D-GNs-PTCA-<br>DA/GCE                               | 0.38        | 0.112                                      | 2                    |
| GOx/C-MEMS                                               | Lac/C-MEMS                                               | 0.91        | 0.136                                      | 3                    |
| GOx/GN/SWCNTs<br>aerogel                                 | BOD/GN/SWCNTs<br>aerogel                                 | 0.61        | 0.190                                      | 4                    |
| GOx/CP/LPEI-C <sub>6</sub> /Fc                           | Lac/CP/MWCNTs/TBAB                                       | 0.55        | 0.024                                      | 5                    |
| GOx/Pd aerogel/ $\beta$ -<br>cyclodextrin/Fc             | BOD/Pd-Pt aerogel                                        | 0.40        | 0.020                                      | 6                    |
| GOx/PANI <sub>1600</sub> @GO/GCE                         | Pt-C/GCE                                                 | 0.76        | 0.756                                      | 7                    |
| GOx/PANI <sub>1600</sub> @GO/CP                          | Lac/PANI <sub>1600</sub> @GO/CP                          | 0.78        | 1.120                                      | 8                    |
| GOx/PCP/GCE                                              | Pt-C/GCE                                                 | 0.68        | 0.548                                      | 9                    |
| GOx/CNCs/GCE                                             | Pt                                                       | 0.59        | 0.055                                      | 10                   |
| GOx/PAE                                                  | BOD/PAE                                                  | 0.77        | 0.132                                      | 11                   |
| GOx/Carbonized RPPy                                      | Lac/Carbonized RPPy                                      | 1.16        | 0.350                                      | 12                   |
| GOx/NQ-LPEI                                              | BOD/AnMWCNT                                              | 0.78        | 0.36                                       | 13                   |
| GOx/TTF/BP                                               | Lac/BP                                                   | 0.511       | 0.018                                      | 14                   |
| GOx/AuNPs/CP                                             | Lac/SWCNTs/CP                                            | 0.60        | 0.053                                      | 15                   |
| GOx/CoPc/PBA/BP                                          | MnO <sub>2</sub> /PBA/BP                                 | 0.65        | 0.136                                      | 16                   |

<sup>b</sup> GOx = glucose oxidase; N-CNTs = N-doped carbon nanotubes; C<sub>3</sub>N<sub>4</sub> = carbon nitride; Lac = laccase; OMCs = ordered mesoporous carbon; GCE = glassy carbon electrode; 3D-GNs = three-dimensional graphene networks; Fc = ferrocene; PTCA = 3,4,9,10-perylene tetracarboxylic acid; DA = dopamine; C-MEMS = carbon microelectromechanical systems; GN = graphene; SWCNTs = single-wall carbon nanotubes; BOD = bilirubin oxidase; CP = carbon paper; LPEI = linear polyethyleneimine; TBAB = tetrabutylammonium bromide; GDH = glucose dehydrogenase; PANI = polyaniline; GO = graphene oxide; PCP = porous

coordination polymers; CNCs = carbon nanochips; PAE = Au nanoparticle-modified paper fibers; RPPy = rectangular polypyrrole; NQ-LPEI = naphthoquinone-LPEI; AnMWCNT = anthracene-modified MWCNT; TTF = tetrathiafulvalene; BP = buckypaper; CoPc = cobalt phthalocyanine; PBA = 1-pyrenebutyric acid.

## References

- 1 C. X. Guo, F. P. Hu, X. W. Lou and C. M. Li, *J. Power Sources*, 2010, **195**, 4090-4097.
- 2 Y. Zhang, M. Chu, L. Yang, Y. Tan, W. Deng, M. Ma, X. Su and Q. Xie, *ACS Appl Mater Interfaces*, 2014, **6**, 12808-12814.
- 3 Y. Song, C. Chen and C. Wang, *Nanoscale*, 2015, **7**, 7084-7090.
- 4 A. S. Campbell, Y. J. Jeong, S. M. Geier, R. R. Koepsel, A. J. Russell and M. F. Islam, *ACS Appl. Mater. Interfaces*, 2015, **7**, 4056-4065.
- 5 M. Jose Gonzalez-Guerrero, F. Javier del Campo, J. Pablo Esquivel, F. Giroud, S.D. Minteer and N. Sabate, *J. Power Sources*, 2016, **326**, 410-416.
- 6 D. Wen, W. Liu, A. K. Herrmann and A. Eychmueller, *Chem. Eur. J.*, 2014, **20**, 4380-4385.
- 7 Z. Kang, K. Jiao, X. Xu, R. Peng, S. Jiao and Z. Hu, *Biosens. Bioelectron.*, 2017, **96**, 367-372.
- 8 Z. Kang, K. Jiao, J. Cheng, R. Peng, S. Jiao and Z. Hu, *Biosens. Bioelectron.*, 2018, **101**, 60-65.
- 9 Z. Kang, K. Jiao, R. Peng, Z. Hu and S. Jiao, *RSC Adv.*, 2017, **7**, 11872-11879.
- 10 Z. Kang, K. Jiao, C. Yu, J. Dong, R. Peng, Z. Hu and S. Jiao, *RSC Adv.*, 2017, **7**, 4572-4579.
- 11 Y. Wang, L. Zhang, K. Cui, S. Ge, P. Zhao and J. Yu, *ACS Appl. Mater. Interfaces*, 2019, **11**, 5114-5122.
- 12 Z. Kang, Y.-H. P. J. Zhang and Z. Zhu, *Biosens. Bioelectron.*, 2019, **132**, 76-83.
- 13 R. A. Escalona-Villalpando, K. Hasan, R. D. Milton, A. Moreno-Zuria, L. G. Arriaga, S. D. Minteer and J. Ledesma-García, *J. Power Sources*, 2019, **414**, 150-157.
- 14 P. Rewatkar, Jayapiriya U. S and S. Goel, *ACS Sustainable Chem. Eng.*, 2020, **8**, 12313-

12320.

15 J. Wan, L. Mi, Z. Tian, Q. Li and S. Liu, *J. Mater. Chem. B*, 2020, **8**, 3550-3556.

16 S. Hao, H. Zhang, X. Sun, J. Zhai and S. Dong, *Nano Res.*, 2021, **14**, 707-714.

**Table S3.** The performances of the glucose/O<sub>2</sub> BFCs directly using four different kinds of soft drinks: iced red tea, aerated water, orange juice, and coconut juice. Price here means the price of 1 mL of soft drinks utilized in the glucose/O<sub>2</sub> BFCs.

| Soft drinks   | $U_{cell}$ (V) | $P_{cell}$ (mW cm <sup>-2</sup> ) | Price (\$) |
|---------------|----------------|-----------------------------------|------------|
| Iced red tea  | 0.815          | 0.414                             | 0.00066    |
| Aerated water | 0.864          | 0.344                             | 0.00043    |
| Orange juice  | 0.796          | 0.349                             | 0.0011     |
| Coconut juice | 0.708          | 0.045                             | 0.0024     |



## Equations

$$E_{pc} = E'^0 - \left[ \frac{RT}{\alpha nF} \right] \ln \left[ \frac{\alpha F n}{RT k_s} v \right] \quad (\text{S1})$$

$$E_{pa} = E'^0 + \left[ \frac{RT}{(1-\alpha)nF} \right] \ln \left[ \frac{(1-\alpha)F n}{RT k_s} v \right] \quad (\text{S2})$$

where  $E'^0$  is the formal potential,  $\alpha$  is the charge transfer coefficient of the system,  $v$  is the scan rate,  $n$  is the electron transfer number in the reaction,  $k_s$  is the heterogeneous electron transfer rate constant,  $T$ ,  $R$ , and  $F$  are temperature, the ideal gas constant and Faraday's constant, respectively.

$$\text{Log} k_s = \alpha \text{Log}(1-\alpha) + (1-\alpha) \text{Log} \alpha - \text{Log} \left( \frac{RT}{nFv} \right) - \alpha(1-\alpha) \left( \frac{nF \Delta E_p}{2.3RT} \right) \quad (\text{S3})$$

$$i_{pc} = \frac{n^2 F^2 A \Gamma^*}{4RT} v \quad (\text{S4})$$

Where  $i_{pc}$  is the cathodic peak current,  $v$  is the scan rate,  $n$  is the number of electron transfer,  $\Gamma^*$  is the surface coverage of enzyme,  $T$ ,  $R$ , and  $F$  are temperature, the ideal gas constant and Faraday's constant, respectively.
